# Supplementary material
Source: publisher figshare collection journal article supplement (https://tandf.figshare.com/ndownloader/files/17766038)
Supplement: Supplementary file 1 [file 17766038]

**Supplementary data**

Fig. S1. Full wavelength scan of CR

Fig. S2. Standard calibration curve of CR at 495 nm
